# Supplementary material for: Static Liquefaction Causes the Flow Failure of a Tailings Dam: A Case Study of El Descargador, Cartagena–La Unión Mining Region, SE Spain (October 1963)
Source: MDPI journal article supplement (doi:10.3390/min12121488), 2022-11-23
Supplement: s1 [file s1]

**Figure S1.** The image shows the contact between the different geological materials and tailings. The discontinuous arrow indicates the direction of the runoff.

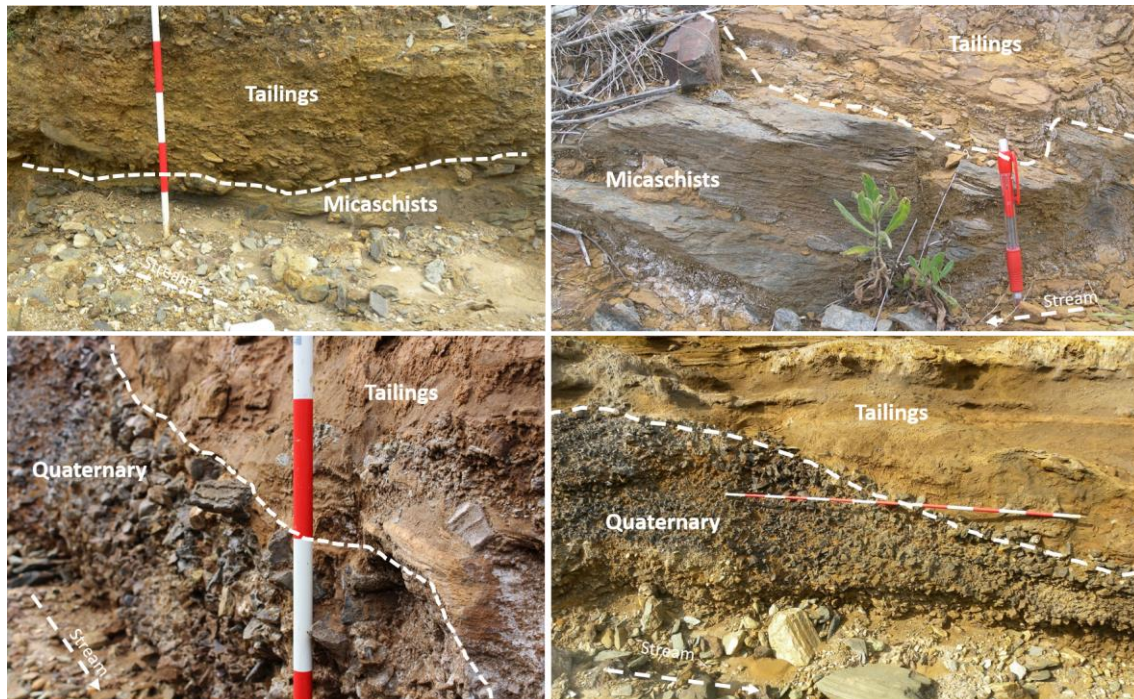

**Figure S2.** Factors of safety for the 13 boundary conditions analyzed, (a) in static conditions and (b) in pseudo-static conditions.

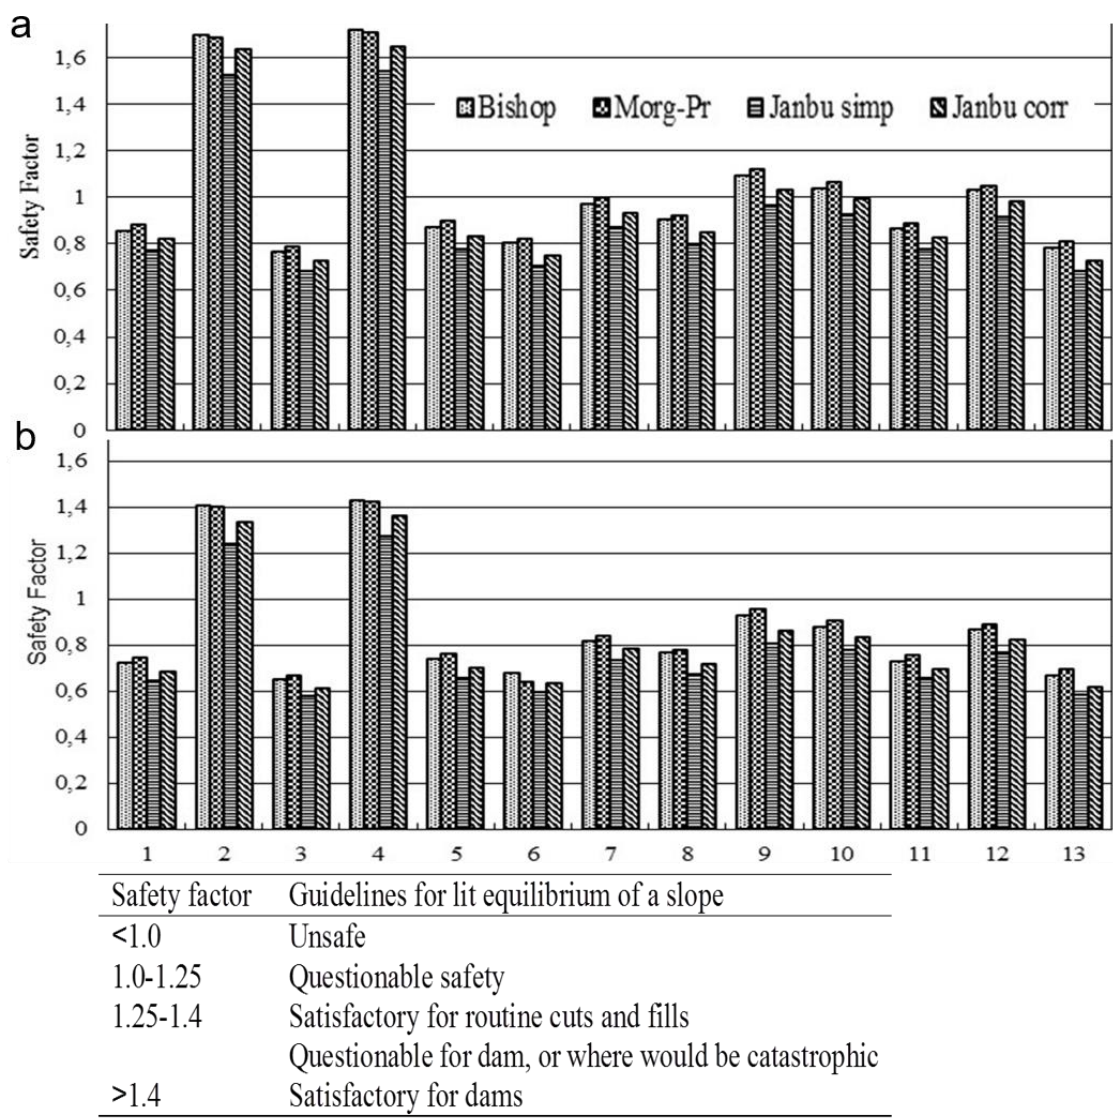

Table S1. Local magnitude (Richter scale) of the seismic events during 1967 over 500 km ratio from El Descargador tailings dam, source Spanish National Geographic Institute (IGN).

| Event | Date     | Depth Km | Magnitud<br>e | Latitude | Longitude | D <sub>0</sub> Km |
|-------|----------|----------|---------------|----------|-----------|-------------------|
| 1     | 25/01/67 | 5        | 3.2           | 38.0983  | -1.1167   | 58                |
| 2     | 25/01/67 | 5        | 3.2           | 38.3567  | -1.0617   | 84                |
| 3     | 30/01/67 | 5        | 2.9           | 35.2883  | -3.5250   | 352               |
| 4     | 07/02/67 | 20       | -             | 36.2450  | -0.2783   | 161               |
| 5     | 04/03/67 | -        | 2.8           | 41.9000  | 2.8400    | 572               |
| 6     | 05/03/67 | -        | 3.2           | 37.7500  | -1.0000   | 19                |
| 7     | 09/03/67 | -        | -             | 41.9500  | 2.6333    | 567               |
| 8     | 17/03/67 | 5        | 4.1           | 34.9367  | -5.4317   | 507               |
| 9     | 27/03/67 | -        | -             | 38.3500  | -0.5000   | 87                |
| 10    | 07/04/67 | -        | 2.9           | 38.3667  | -0.8000   | 83                |
| 11    | 10/04/67 | -        | 3.0           | 37.0500  | -1.5000   | 85                |
| 12    | 23/04/67 | 5        | 4.8           | 36.2567  | 2.3983    | 327               |
| 13    | 27/04/67 | -        | 4.7           | 35.7000  | -0.2000   | 221               |
| 14    | 27/04/67 | -        | -             | 34.5000  | -6.0000   | 578               |
| 15    | 05/05/67 | -        | -             | 40.8167  | 0.5167    | 375               |
| 16    | 12/05/67 | 5        | 2.6           | 39.9700  | -3.9183   | 280               |
| 17    | 14/05/67 | 5        | 3.0           | 36.8533  | -1.7633   | 117               |
| 18    | 17/05/67 | 5        | 2.9           | 36.3033  | -3.1367   | 250               |
| 19    | 17/05/67 | 19       | 4.1           | 37.7933  | -4.3100   | 305               |
| 20    | 27/05/67 | 5        | 4.7           | 35.8583  | -0.1933   | 204               |
| 21    | 27/05/67 | -        | 3.1           | 37.5500  | -4.0000   | 277               |
| 22    | 30/05/67 | -        | 2.7           | 36.2500  | -4.2000   | 334               |
| 23    | 06/06/67 | -        | 3.5           | 40.4000  | 4.1800    | 535               |
| 24    | 18/06/67 | -        | 3.1           | 36.8250  | -3.5533   | 254               |
| 25    | 01/07/67 | 5        | 3.2           | 36.3817  | -3.4883   | 271               |
| 26    | 02/07/67 | 5        | 3.4           | 36.7283  | -3.6556   | 267               |
| 27    | 11/07/67 | -        | 3.1           | 38.2000  | -0.6000   | 69                |
| 28    | 13/07/67 | 5        | 5.0           | 35.5300  | -0.1267   | 241               |
| 29    | 21/07/67 | 5        | 3.6           | 36.7283  | -3.4450   | 250               |
| 30    | 23/07/67 | -        | 3.0           | 36.0000  | -3.6500   | 272               |
| 31    | 24/07/67 | 5        | 3.2           | 35.6350  | -0.2883   | 226               |
| 32    | 25/07/67 | 5        | 4.5           | 37.4583  | -3.5583   | 239               |
| 33    | 26/07/67 | 5        | 2.5           | 37.1917  | -3.3717   | 226               |
| 34    | 27/07/67 | 5        | 3.3           | 36.6333  | -5.4967   | 426               |
| 35    | 29/07/67 | 5        | 4.2           | 38.3567  | -1.3833   | 94                |
| 36    | 30/07/67 | 5        | 2.4           | 10.8217  | -1.2350   | 357               |
| 37    | 01/08/67 | -        | 2.9           | 38.3000  | -1.3500   | 87                |
| 38    | 03/08/67 | 5        | 3.9           | 38.3567  | -1.2883   | 90                |
| 39    | 03/08/67 | 5        | 3.5           | 38.3567  | -1.2833   | 90                |
| 40    | 03/08/67 | -        | -             | 38.3567  | -1.2833   | 90                |
| 41    | 15/08/67 | 5        | 2.8           | 37.3917  | -2.4483   | 143               |

|    |          |    |     |         |         |     |
|----|----------|----|-----|---------|---------|-----|
| 42 | 16/08/67 | -  | -   | 35.5000 | -1.3000 | 239 |
| 43 | 08/09/67 | -  | 3.7 | 40.9700 | -2.0200 | 384 |
| 44 | 11/09/67 | 5  | 4.6 | 36.2500 | 2.8683  | 365 |
| 45 | 21/09/67 | 5  | -   | 34.9383 | -4.2567 | 427 |
| 46 | 21/09/67 | -  | 3.1 | 36.8500 | -4.2500 | 312 |
| 47 | 22/09/67 | 5  | 3.6 | 36.8667 | -3.1317 | 218 |
| 48 | 27/09/67 | -  | -   | 33.5000 | 2.0000  | 526 |
| 49 | 01/10/67 | -  | 2.9 | 36.7000 | -4.7000 | 356 |
| 50 | 02/10/67 | -  | -   | 38.5667 | -0.5500 | 107 |
| 51 | 02/10/67 | -  | -   | 38.5667 | -0.5500 | 107 |
| 52 | 02/10/67 | 5  | 3.7 | 38.5750 | -0.5450 | 110 |
| 53 | 06/10/67 | 5  | 3.6 | 35.1350 | -4.1133 | 401 |
| 54 | 28/10/67 | 9  | -   | 36.8067 | -5.1383 | 390 |
| 55 | 01/11/67 | 12 | 3.3 | 35.6933 | -3.7300 | 334 |
| 56 | 07/11/67 | 23 | 3.0 | 34.7133 | -3.0983 | 381 |
| 57 | 08/11/67 | -  | 2.6 | 37.1000 | -4.0500 | 288 |
| 58 | 14/11/67 | 5  | 3.1 | 35.4117 | -3.5600 | 344 |
| 59 | 14/11/67 | 20 | 4.0 | 35.4250 | -3.8017 | 358 |
| 60 | 16/11/67 | 13 | 3.8 | 35.3500 | -3.5017 | 346 |
| 61 | 17/11/67 | -  | 3.1 | 36.8000 | -5.4500 | 417 |
| 62 | 17/11/67 | 18 | 3.2 | 36.7283 | -4.4100 | 330 |
| 63 | 26/11/67 | -  | -   | 35.5000 | -0.5000 | 237 |
| 64 | 26/11/67 | 5  | 3.8 | 39.0733 | -3.4667 | 279 |
| 65 | 29/12/67 | 5  | 2.9 | 36.5350 | -2.4267 | 184 |

---

Table S2. Particle size distribution (PSD) of the tailings samples collected in the trial pit (P1–P9) and the sand dykes (W1–W13). D10, D30, D50, D60, D90 are the particle size at the 10, 30, 50, 60, 90 % point of the cumulative undersize PSD in microns, Cu is the coefficient of uniformity, Cc is the coefficient of curvature, Sr is degree of saturation, e is void ratio, w is gravimetric water content, n is porosity, C is cohesion and  $\phi$  is friction angle .

| No. | $D_{10}$ | $D_{30}$ | $D_{50}$ | $D_{60}$ | $D_{90}$ | $C_u$ | $C_c$ | Gs   | Sr   | e    | w    | n    | C<br>(MPa) | $\Phi$<br>(°C) | Dry density<br>(g/cm <sup>3</sup> ) | Gradation |
|-----|----------|----------|----------|----------|----------|-------|-------|------|------|------|------|------|------------|----------------|-------------------------------------|-----------|
| P1  | 11.30    | 117.01   | 211.51   | 264.38   | 547.29   | 23.40 | 4.58  | 3.01 | 1.00 | 0.90 | 0.30 | 0.47 | 0          | 27             | 17.6                                | SM        |
| P2  | 1.17     | 3.72     | 9.74     | 16.06    | 77.68    | 13.73 | 0.74  | 2.91 | 1.00 | 1.02 | 0.35 | 0.50 | 0          | 28             | 14.23                               | n.a.      |
| P3  | 7.04     | 68.04    | 114.87   | 138.90   | 257.53   | 19.73 | 4.73  | 2.93 | 1.00 | 0.98 | 0.33 | 0.49 | 0          | 29             | 15.9                                | SM        |
| P4  | 3.17     | 28.86    | 79.48    | 107.72   | 262.74   | 33.98 | 2.44  | 2.94 | 1.00 | 0.96 | 0.33 | 0.49 | 0          | 28             | 18.1                                | SM        |
| P5  | 15.15    | 137.56   | 216.32   | 258.43   | 469.19   | 17.06 | 4.83  | 2.96 | 1.00 | 0.88 | 0.30 | 0.47 | 0          | 27             | 14.23                               | SM        |
| P6  | 2.32     | 15.70    | 66.31    | 104.45   | 372.60   | 45.02 | 1.02  | 2.92 | 1.00 | 1.05 | 0.36 | 0.51 | 0          | 28             | 15.9                                | SM        |
| P7  | 12.81    | 142.44   | 252.19   | 312.39   | 641.69   | 24.39 | 5.07  | 2.96 | 1.00 | 0.97 | 0.33 | 0.49 | 0          | 26             | 18.9                                | SM        |
| P8  | 1.56     | 5.26     | 16.05    | 28.51    | 147.01   | 18.28 | 0.62  | 2.86 | 1.00 | 1.20 | 0.42 | 0.55 | 0          | 27             | 17.69                               | n.a.      |
| P9  | 0.91     | 2.43     | 4.63     | 6.36     | 20.34    | 6.99  | 1.02  | 2.85 | 1.00 | 1.16 | 0.41 | 0.54 | 0          | 28             | 15.26                               | n.a.      |
| W1  | 45.64    | 167.67   | 273.37   | 336.02   | 688.91   | 7.36  | 1.83  | 3.06 | 0.32 | 0.96 | 0.10 | 0.49 | 0          | 29             | 18.3                                | SW-SM     |
| W2  | 27.47    | 155.39   | 245.86   | 292.37   | 514.53   | 10.64 | 3.01  | 3.04 | 0.30 | 1.02 | 0.10 | 0.50 | 0          | 30             | 18.2                                | SM        |
| W3  | 27.10    | 179.24   | 310.12   | 381.96   | 746.85   | 14.09 | 3.10  | 2.97 | 0.40 | 1.05 | 0.14 | 0.51 | 0          | 31             | 19.7                                | SM        |
| W4  | 29.12    | 190.90   | 324.02   | 396.82   | 756.39   | 13.63 | 3.15  | 3.09 | 0.50 | 1.08 | 0.17 | 0.52 | 0          | 37             | 19.1                                | SM        |
| W5  | 17.79    | 154.99   | 305.17   | 378.53   | 737.95   | 21.28 | 3.57  | 3.14 | 0.20 | 1.09 | 0.07 | 0.52 | 0          | 26             | 18.4                                | SM        |
| W6  | 53.61    | 339.33   | 568.55   | 689.89   | 1257.98  | 12.87 | 3.11  | 2.91 | 0.39 | 0.95 | 0.13 | 0.49 | 0          | 27             | 16.5                                | n.a.      |
| W7  | 167.22   | 291.50   | 395.25   | 454.45   | 755.50   | 2.72  | 1.12  | 3.01 | 0.10 | 0.94 | 0.03 | 0.48 | 0          | 29             | 19.4                                | n.a.      |
| W8  | 18.52    | 130.25   | 257.96   | 327.72   | 673.80   | 17.70 | 2.80  | 3.12 | 0.11 | 1.06 | 0.04 | 0.51 | 0          | 30             | 18.6                                | SM        |
| W9  | 24.98    | 164.08   | 284.20   | 354.99   | 795.84   | 14.21 | 3.04  | 3.14 | 0.08 | 1.07 | 0.03 | 0.52 | 0          | 29             | 19.3                                | SM        |
| W10 | 116.46   | 271.76   | 370.07   | 423.39   | 676.33   | 3.64  | 1.50  | 3.01 | 0.18 | 0.94 | 0.06 | 0.48 | 0          | 30             | 16.8                                | n.a.      |
| W11 | 4.08     | 25.03    | 75.06    | 131.61   | 620.84   | 32.26 | 1.17  | 3.03 | 0.29 | 1.01 | 0.10 | 0.50 | 0          | 29             | 18.7                                | SM        |
| W12 | 4.39     | 30.81    | 111.74   | 190.02   | 604.93   | 43.28 | 1.14  | 3.03 | 0.12 | 1.02 | 0.04 | 0.50 | 0          | 29             | 19.4                                | SM        |

Table S3. Safety factors for different calculation hypotheses. Fs is phreatic surface, BS is Bishop simplify Method, MP is Morgenstem-Price Methods, JS is Janbú simplify Method, JC is Janbú simplify Method. Sp is that the height of the water table is at the surface of the dam and Md is at the middle and D means that the dam of tailings dam is dry. \*In scenario 13, the lagoons are considered full of water.

| Hypothesis | Sandy<br>(m) | Silty<br>(m) | Dam<br>(m) | FS | BS     | MP   | JS   | JC   | BS                          | MP   | JS   | JC   |
|------------|--------------|--------------|------------|----|--------|------|------|------|-----------------------------|------|------|------|
|            |              |              |            |    | Static |      |      |      | Pseudo-static<br>(PGA=0.18) |      |      |      |
| 1          | 2            | 1            | 1          | Sp | 0.85   | 0.88 | 0.77 | 0.82 | 0.77                        | 0.75 | 0.65 | 0.69 |
| 2          | 2            | 1            | 1          | Md | 1.69   | 1.69 | 1.52 | 1.63 | 1.40                        | 1.4  | 1.24 | 1.33 |
| 3          | 1            | 2            | 1          | Sp | 0.76   | 0.86 | 0.68 | 0.72 | 0.65                        | 0.67 | 0.58 | 0.61 |
| 4          | 1            | 2            | 1          | Md | 1.71   | 1.70 | 1.53 | 1.65 | 1.42                        | 1.43 | 1.27 | 1.36 |
| 5          | 2            | 1            | 2          | Sp | 0.87   | 0.90 | 0.77 | 0.83 | 0.74                        | 0.76 | 0.66 | 0.70 |
| 6          | 1            | 2            | 2          | D  | 0.80   | 0.82 | 0.70 | 0.75 | 0.68                        | 0.64 | 0.60 | 0.63 |
| 7          | 2            | 1            | 1          | D  | 0.96   | 0.99 | 0.87 | 0.93 | 0.82                        | 0.84 | 0.73 | 0.78 |
| 8          | 1            | 2            | 1          | D  | 0.90   | 0.92 | 0.79 | 0.84 | 0.77                        | 0.78 | 0.67 | 0.71 |
| 9          | 2            | 1            | 2          | D  | 1.09   | 1.12 | 0.96 | 1.03 | 0.93                        | 0.96 | 0.81 | 0.86 |
| 10         | 1            | 2            | 2          | D  | 1.03   | 1.03 | 0.92 | 0.99 | 0.88                        | 0.91 | 0.78 | 0.83 |
| 11         | 0.5          | 2            | 1          | D  | 0.86   | 0.89 | 0.77 | 0.82 | 0.73                        | 0.76 | 0.66 | 0.69 |
| 12         | 0.5          | 2            | 2          | D  | 1.03   | 1.05 | 0.91 | 0.98 | 0.87                        | 0.89 | 0.77 | 0.82 |
| 13*        | 1            | 2            | 1          | D  | 0.71   | 0.81 | 0.68 | 0.73 | 0.67                        | 0.70 | 0.58 | 0.62 |
